# Supplementary material for: Quality Assessment of Day-Old Chickens on the Broiler Farms of Hong Kong
Source: MDPI journal article supplement (doi:10.3390/ani12121520), 2022-06-10
Supplement: s1 [file s1]

### **Supplementary materials**

**Table S1.** Current vaccination program for avian reovirus (ARV), highly pathogenic avian influenza (HPAI), infectious bronchitis (IB), infectious bursal disease (IBD/G), Marek's disease (MD), Newcastle disease (ND), and avian metapneumovirus (AmPV) in broiler breeders in Hong Kong.

| <b>Age (day)</b> | <b>Vaccine</b> | <b>Type<sup>1</sup></b>                  | <b>Strain</b>             | <b>Dosage</b> | <b>Route<sup>2</sup></b> |
|------------------|----------------|------------------------------------------|---------------------------|---------------|--------------------------|
| 3                | MD<br>IBD+ND   | Cell-associated (CA)/herpes virus vector | CVI988<br>rHVT-ND-IBD     | 1:1<br>0.2ml  | SC<br>(hatchery)         |
|                  | ND+IB          | Live                                     | Ma5+Clone30               | 1 dose        | IN                       |
| 7                | ND+IBD         | Live                                     | LaSota+Vac-ST             | 1:1 0.5 ml    | SC                       |
| 14               | HPAI           | Killed                                   | H5+H7                     | 0.5 ml        | SC                       |
| 17               | ND+LPAI        | Killed                                   | LaSota+H9                 | 0.5 ml        | SC                       |
| 22               | ILT            | Live                                     | CEO                       | 1 dose        | IO                       |
| 70               | AmPV           | Live                                     | Rhino-CV                  | 1 dose        | IO                       |
| 140              | AmPV           | Killed                                   | BUT1#8544                 | 0.5 ml        | IM                       |
| 140              | ND+LPAI        | Killed                                   | LaSota+H9                 | 0.5 ml        | IM                       |
| 180              | HPAI           | Killed                                   | H5+H7                     | 0.5 ml        | IM                       |
| 180              | ND+IB+G+Reo    | Killed                                   | Clone30+M41+D78+1733+2408 | 0.5 ml        | IM                       |

<sup>1</sup>Live = live attenuated vaccine; killed = inactivated vaccine

<sup>2</sup>Route of administration = subcutaneous (SC); intranasal (IN); intraocular (IO); and intramuscular (IM)

**Table S2.** Current vaccination program for avian reovirus (ARV), infectious bronchitis (IB), infectious bursal disease (IBD/G), and Newcastle disease (ND) in broiler breeders in mainland China. Information provided in this table is based on the farmers' best knowledge regarding the suppliers.

| Age (day) | Vaccine       | Type <sup>1</sup> | Strain              | Dosage | Route <sup>2</sup> |
|-----------|---------------|-------------------|---------------------|--------|--------------------|
| 1         | ND+IB         | Live              | LaSota+QX           |        | Spray              |
| 1         | ND+IBD+H9     | Killed            | LaSota+B87+H9       | 0.15ml | SC                 |
| 5         | Reo           | Live              | 1133                | 0.2ml  | SC                 |
| 10        | ND+IB         | Live              | LaSota+QX           | 1dose  | IO                 |
| 10        | ND+IB+IBD+H9  | Killed            | NDg7+QX+B87+H9?     | 0.3ml  | SC                 |
| 40        | ND            | Live              | LaSota              | 2doses | IO                 |
| 50        | ND+H9+Adeno   | Killed            | NDg7+H9+Adeno(S?)   | 0.5ml  | IM                 |
| 60        | Reo           | Live              | 1133                | 0.2ml  | SC                 |
| 125       | ND+H9+Adeno   | Killed            | NDg7+H9+Adeno(S?)   | 0.5ml  | IM                 |
| 140       | ND            | Live              | LaSota              | 3doses | IO                 |
| 155       | ND+IB+IBD+Reo | Killed            | LaSota+QX+VP2+1133? | 0,5ml  | IM                 |
| 165       | ND+IB         | Live              | LaSota+QX           | 1dose  | IO                 |
| 240       | ND+IB         | Live              | LaSota+QX           | 1dose  | IO                 |
| 270       | ND+IB         | Live              | LaSota+QX           | 1dose  | IO                 |

<sup>1</sup>Live = live attenuated vaccine; killed = inactivated vaccine

<sup>2</sup>Route of administration = subcutaneous (SC); intranasal (IN); intraocular (IO); and intramuscular (IM)

**Table S3.** Suggested vaccination program for avian reovirus (ARV), highly pathogenic avian influenza (HPAI), infectious bronchitis (IB), infectious bursal disease (IBD/G), Marek's disease (MD), Newcastle disease (ND), chicken anemia virus (CAV), and avian metapneumovirus (AmPV) in the only broiler breeder farm in Hong Kong.

| Age (day) | Vaccine     | Type <sup>1</sup> | Strain                    | Dosage     | Route <sup>2</sup>   |
|-----------|-------------|-------------------|---------------------------|------------|----------------------|
| 1         | MD          | CA / HVT vector   | CVI988 +rHVT-ND-IBD       | 1:1 0.2ml  | SC (hatchery)        |
| 1         | ND+IB       | Live              | Ma5+Clone30               | 1 dose     | IN/Spray in hatchery |
| 1         | AmPV        | Live              | Rhino CV                  | 1 dose     | IN/Spray in hatchery |
| 7         | ND+IBD      | Live              | LaSota+Vac-ST             | 1:1 0.5 ml | SC                   |
| 10        | HPAI        | Killed            | H5+H7                     | 0.5 ml     | SC                   |
| 14        | IB          | Live              | IB 4/91                   | 1 dose     | IN                   |
| 17        | ND+LPAI     | Killed            | LaSota+H9                 | 0.5 ml     | SC                   |
| 22        | ILT         | Live              | CEO                       | 1 dose     | IO                   |
| 70        | CAV         | Live              | CAV P4                    | 0.2 ml     | IM                   |
| 90        | ND+IB+G+Reo | Killed            | Clone30+M41+D78+1733+2408 | 0.5 ml     | IM                   |
| 120       | AmPV        | Killed            | BUT1#8544                 | 0.5 ml     | IM                   |
| 140       | ND+LPAI     | Killed            | LaSota+H9                 | 0.5 ml     | IM                   |
| 160       | HPAI        | Killed            | H5+H7                     | 0.5 ml     | IM                   |
| 180       | ND+IB+G+Reo | Killed            | Clone30+M41+D78+1733+2408 | 0.5 ml     | IM                   |

<sup>1</sup>Live = live attenuated vaccine; killed = inactivated vaccine

<sup>2</sup>Route of administration = subcutaneous (SC); intranasal (IN); intraocular (IO); and intramuscular (IM)
